# Supplementary material
Source: PubMed Central journal article supplement (PMC5708138)
Supplement: NIHMS921163-supplement-supplement_1.pdf [file NIHMS921163-supplement-supplement_1.pdf]

---

Supplementary Table 1

Loci of transient and sustained subsequent memory-related simulation effects

---

| MNI Coordinates          |     |     | Peak Z | Number of above-threshold voxels | Region                        |
|--------------------------|-----|-----|--------|----------------------------------|-------------------------------|
| x                        | y   | z   |        |                                  |                               |
| <i>Transient effects</i> |     |     |        |                                  |                               |
| -39                      | -12 | -12 | 5.36   | 30                               | L insula                      |
| 14                       | 5   | -15 | 5.33   | 52                               | R dorsal striatum             |
| 5                        | -37 | -18 | 4.95   | 27                               | R cerebellum                  |
| -12                      | 16  | 7   | 4.89   | 27                               | L striatum                    |
| 5                        | 20  | -4  | 4.88   | 35                               | R anterior cingulate cortex   |
| 47                       | -15 | 40  | 4.83   | 26                               | R precentral gyrus            |
| -20                      | 16  | -1  | 4.78   | 34                               | L striatum                    |
| 26                       | -9  | -13 | 4.71   | 77                               | R hippocampus                 |
| 30                       | -13 | -7  | 3.97   |                                  | R striatum                    |
| 9                        | -18 | 16  | 4.71   | 41                               | R thalamus                    |
| 33                       | 2   | -24 | 4.68   | 34                               | R amygdala                    |
| 50                       | -39 | -19 | 4.56   | 37                               | L inferior temporal gyrus     |
| 23                       | -19 | -24 | 4.51   | 21                               | R parahippocampal gyrus       |
| 0                        | -63 | -8  | 4.47   | 23                               | L R cerebellum                |
| -18                      | 8   | -9  | 4.45   | 56                               | L striatum                    |
| 45                       | -28 | -24 | 4.44   | 21                               | R inferior temporal gyrus     |
| 26                       | 2   | -33 | 4.36   | 54                               | R temporal pole               |
| 29                       | -3  | -40 | 3.76   |                                  | R inferior temporal sulcus    |
| 20                       | -4  | -30 | 3.49   |                                  | R amygdala                    |
| 0                        | 28  | -9  | 4.23   | 30                               | L R anterior cingulate cortex |
| -12                      | -43 | -18 | 4.27   | 65                               | L cerebellum                  |
| 6                        | -58 | -51 | 4.27   | 20                               | R cerebellum                  |
| 18                       | 13  | 8   | 4.16   | 37                               | R striatum                    |
| -15                      | -36 | 46  | 4.15   | 58                               | L cingulate sulcus            |

|                          |     |     |      |    |                             |
|--------------------------|-----|-----|------|----|-----------------------------|
| 41                       | -58 | -25 | 4.10 | 33 | R cerebellum                |
| 12                       | -24 | 8   | 4.04 | 51 | R thalamus                  |
| 38                       | -54 | -37 | 3.99 | 26 | R cerebellum                |
| 23                       | -78 | -22 | 3.95 | 49 | R cerebellum                |
| 51                       | -69 | -31 | 3.94 | 56 | R cerebellum                |
| 26                       | -16 | -18 | 3.71 | 20 | R hippocampus               |
| 2                        | -16 | 10  | 3.65 | 22 | L R thalamus                |
| -2                       | -48 | -43 | 3.62 | 21 | L cerebellum                |
| <i>Sustained effects</i> |     |     |      |    |                             |
| 27                       | -13 | 56  | 5.21 | 70 | R precentral gyrus          |
| -30                      | -21 | 67  | 4.92 | 24 | L precentral gyrus          |
| 27                       | 1   | 4   | 4.52 | 33 | R striatum                  |
| 20                       | -43 | 56  | 4.42 | 26 | R cingulate sulcus          |
| 3                        | 1   | 38  | 4.36 | 37 | R anterior cingulate cortex |
| -3                       | -12 | 62  | 4.28 | 35 | L paracentral lobule        |
| 30                       | -16 | 4   | 4.23 | 20 | R striatum                  |
| -20                      | -78 | -33 | 4.18 | 24 | L cerebellum                |
| 3                        | -10 | 5   | 4.18 | 25 | R thalamus                  |
| 15                       | -1  | 55  | 3.96 | 19 | R superior frontal gyrus    |
| 27                       | 2   | -10 | 3.91 | 24 | R striatum                  |

---
